# Supplementary material
Source: Research Square preprint supplement (doi:10.21203/rs.3.rs-10029742/v1)
Supplement: Supplementary file 1 [file 209da1dfbd163b4a10969624.docx]

**Appendix A: Instrumental Variable (IV) Strategy**

In the main text, we introduce the instrumental variable (IV) strategy to solve the endogeneity issue regarding racial composition; our IV is historical racial composition. For Seattle, the 1990 census is the earliest census with consistent census tracts aligning with current data.

An ideal IV would be the random assignment of a “treatment” that affects the outcome solely through its effect on the endogenous variable. This setting is often impossible in social science, but statisticians propose principles to similarly test the validity of the IV. An alternative IV must still satisfy two conditions similar to those met by a random treatment: it must be a strong predictor of the endogenous variable (“first-stage regression”), and must affect the dependent variable only through the endogenous variable (“exclusion restriction”).

Therefore, we must identify a strong predictor of racial composition that does not affect graffiti reporting through channels other than racial composition.

The intuition behind our proposed historical IV is that a minority population replicates earlier settlers’ residential patterns. Historical and present composition are separated by a long time span that recent settlers may follow earlier settlers’ patterns but differ considerably in size, along with substantial changes in local social, cultural, and economic landscapes, such as graffiti in terms of creation, reporting system and technology, and attitudes.

As a historically white city, Seattle experienced a sharp increase in the minority population due to immigration waves only after 1990. Therefore, this IV follows the logic of ensuring a long time span between historical and present demographics. Table A1’s first two columns show robust first-stage regressions: the proportion of minority residents in 1990 strongly predicts the proportion of minority residents in 2020.

Table A1. Instrumental Variable Validity

|  | First-stage regressions† | | Exclusion restriction: Other 2020 census tract features | | | | | |
| --- | --- | --- | --- | --- | --- | --- | --- | --- |
|  | (1) | (2) | (3) | (4) | (5) | (6) | (7) | (8) |
| Dep. var.: | % minority in 2020 | | Square miles | Total tract population | Log med. hh. income | % rent in income | Gini index | % graduate degrees |
| % minority 1990 | 0.552***  (0.041) | 0.354***  (0.039) | -0.056  (0.250) | 666.664  (463.702) | 0.021  (0.047) | -0.294  (0.231) | 0.046  (0.026) | 0.015  (0.024) |
| Other var. | No | Yes | Yes | Yes | Yes | Yes | Yes | Yes |
| R-squared | 0.629 | 0.192 | 0.332 | 0.209 | 0.932 | 0.304 | 0.225 | 0.704 |
| Obs. | 177 | 177 | 177 | 177 | 177 | 177 | 177 | 177 |

*: *p* < 0.05; **: *p* < 0.01; ***: *p* < 0.001. Standard errors are in parentheses. Other variables are included in all regressions but, for conciseness, are not reported. †: F-statistics for the first-stage regressions are above 50.

We cannot directly test the exclusion restriction because unobservable neighborhood features cannot be included. But Table A1’s remaining columns suggest our IV is at least unrelated to observable neighborhood features. This IV is thus unlikely to affect graffiti reporting through these insignificant relationships, which provides indirect evidence that historical racial composition should affect graffiti reporting only through present racial composition.

**Appendix B: The Direction of OLS Bias**

In our empirical tables, we report that OLS estimates are generally biased toward zero relative to IV estimates. There are two main statistical reasons. First, measurement errors in racial composition, due to multiple race identification, always lead the OLS estimate to be biased toward zero (Xu, 2017). Second, the unobservable willingness and ability to report graffiti also account for this bias, but their roles are more complex. The direction of the bias is determined by the product of signs of and , where represents the correlation between the level of engagement amid barriers and the proportion of local minority residents, and represents the correlation between the level of engagement and the proportion of reported hate graffiti. In one scenario, (minorities are less engaged in neighborhoods with proportionately more minorities), possibly because barriers dominate the level of engagement despite local support. If, furthermore, residents in minority neighborhoods engage in addressing hate graffiti more often than residents in white neighborhoods (, then the OLS estimate is biased away from zero. This bias decreases when minority and white neighborhoods have more similar focus on graffiti reporting by form ( becomes closer to 0), and ultimately becomes toward zero when minorities’ engagement encompasses more non-hate graffiti than whites (). In another scenario, this evolving pattern of bias will reverse if support—rather than barriers—dominates the level of engagement ().

In the results section, Table 2’s reported OLS bias suggests a possible scenario (besides measurement errors): compared to residents in white neighborhoods, those in minority neighborhoods are more willing to report all forms of graffiti, although various barriers may hinder such engagement (i.e., and ).
